# Supplementary material
Source: PubMed Central journal article supplement (PMC3911284)
Supplement: MCB.01169-13_zmb999100243so1.pdf [file MCB.01169-13_zmb999100243so1.pdf]

## SUPPLEMENTAL MATERIALS AND METHODS

**GST pull-down assay.** GST and GST-FIH-1 recombinant proteins were prepared as previously described (1). Wild-type (WT) and TS/AA HF-Mint3 proteins were collected from lysates of HT1080 cells expressing WT or TS/AA HF-Mint3 by immunoprecipitation using anti-FLAG M2 antibody-conjugated beads (Sigma) followed by elution with FLAG peptides. Glutathione-Sepharose 4B (GE Healthcare)-conjugated GST fusion proteins ( $\approx 10 \mu\text{g}$ ) were preincubated with 0.5 mg/ml bovine serum albumin in lysis buffer for 30 min at 4 °C. Thereafter, WT or TS/AA HF-Mint3 was re-suspended in lysis buffer containing 0.5 mg/ml bovine serum albumin and added to the beads. After mixing by rotation for 2 h, the beads were washed four times with lysis buffer. The proteins were eluted with Laemmli sample buffer and analyzed by SDS-PAGE, followed by immunoblot analysis using anti-FLAG antibody (SIGMA) or anti-GST antibody (GeneTex, Irvine, CA).

**HIF-2 $\alpha$  reporter assay.** pcDNA3.1 Gal4BD-HIF2 $\alpha$  CAD (encoding amino acids 771-870) plasmid was prepared using a PCR based method. The reporter assay was performed as described in the main text.

## REFERENCES

1. **Sakamoto, T., and M. Seiki.** 2009. Mint3 enhances the activity of hypoxia-inducible factor-1 (HIF-1) in macrophages by suppressing the activity of factor inhibiting HIF-1. *J Biol Chem* **284**:30350-30359.

## SUPPLEMENTAL FIGURE LEGENDS

### **Figure S1. mTOR and MT1-MMP cooperatively boost HIF-1 $\alpha$ activity in HEK293 cells**

Reporter assays were performed in the presence or absence of rapamycin in HEK293 cells. The results of the reporter assays are shown. The data were analysed using the Student's t-test. \*\*p < 0.01.

### **Figure S2. Posttranslational modification of Mint3**

Areas enclosed by dashed lines in Fig. 3A, 3B, and 3D were magnified (left) and analysed by densitometry (right).

### **Figure S3. Posttranslational modification of HF-Mint3**

Areas enclosed by dashed lines in Fig. 4A, 4D, 4F, and 4G were magnified (left) and analysed by densitometry (right).

### **Figure S4. mTOR regulates the translational modification of Mint3 in HEK293 cells**

Rapamycin treatment increased the isoelectric point of the Mint3 protein. Relative intensity of each Mint3 signal is shown above the spot.

### **Figure S5. Phosphorylation of Mint3 by mTOR does not directly affect the binding affinity of Mint3 protein to FIH-1**

A pull-down assay was performed using GST or GST-FIH-1 beads.

### **Figure S6. The MT1-MMP/Mint3 axis moderately promotes HIF-2 $\alpha$ activity**

(A, B) Reporter assays were performed in the presence or absence of rapamycin in HEK293 cells (A) or in control (shLacZ), Mint3 knocked-down, and MT1-MMP knocked-down HT1080 cells

(B). The results of the reporter assays are shown. The data were analysed using the Student's t-test. \* $p < 0.05$ , \*\* $p < 0.01$ .

Figure S1

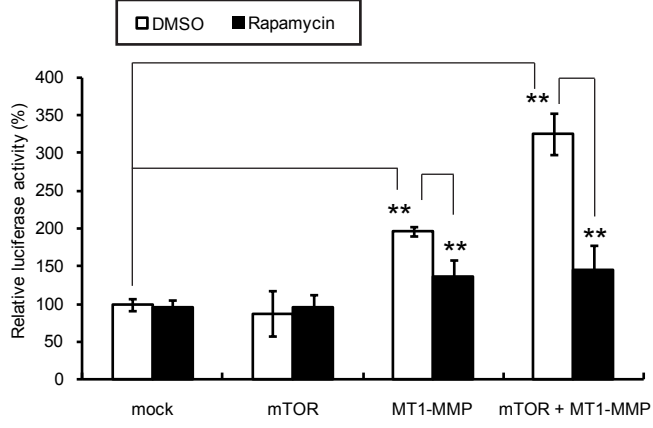

Fig. 3A

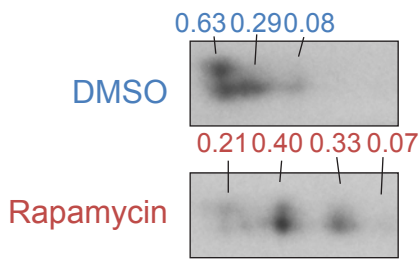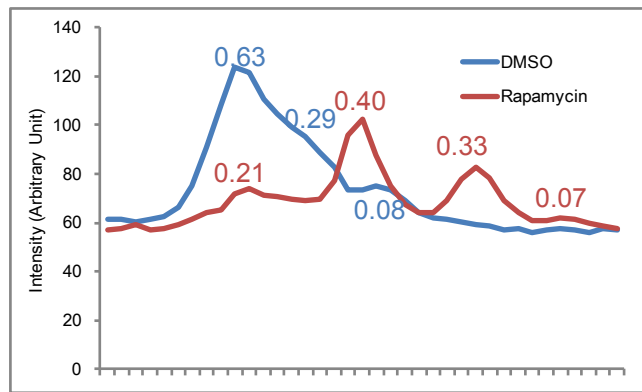

Fig. 3B

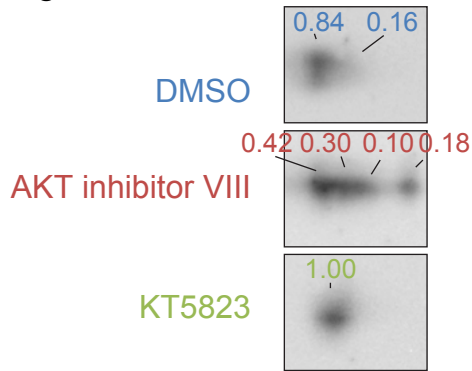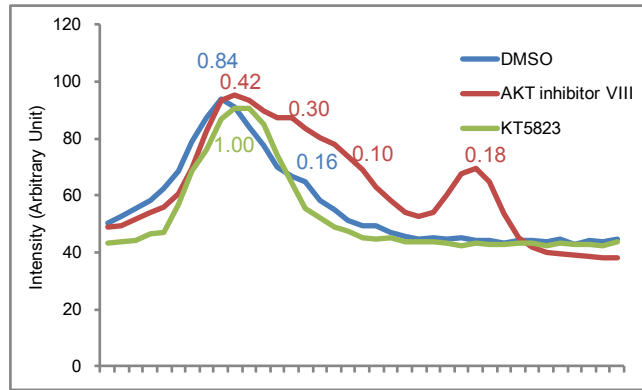

Fig. 3D

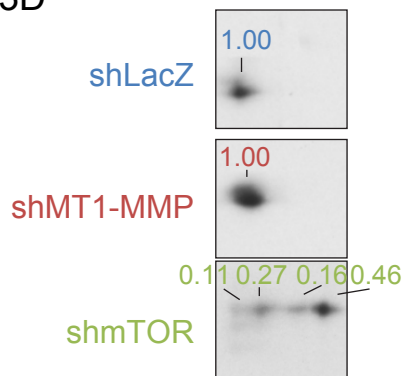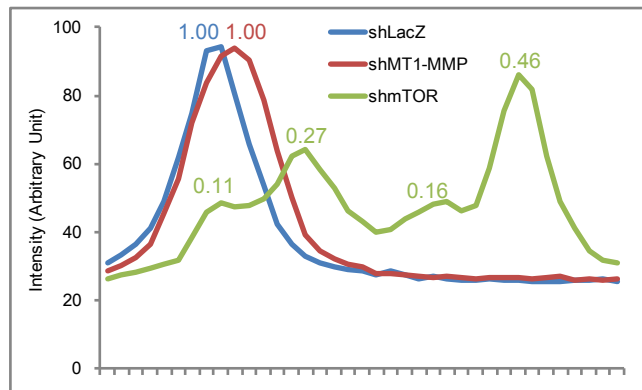

Fig. 4A

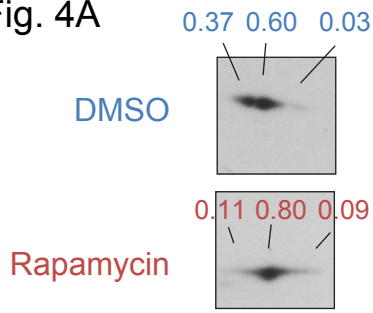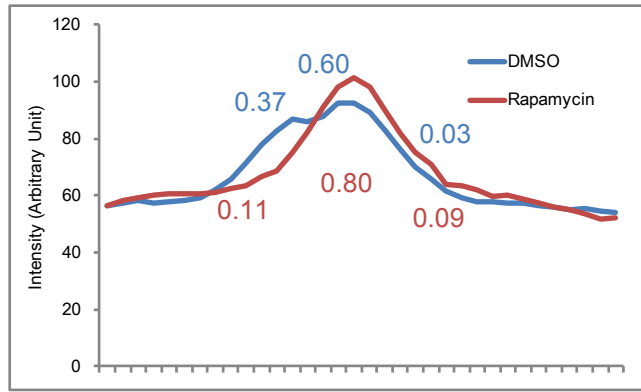

Fig. 4D

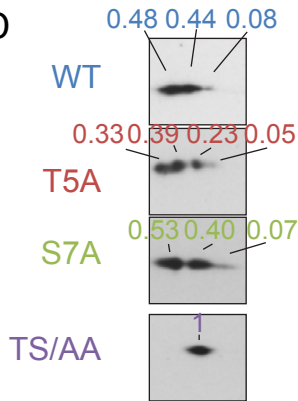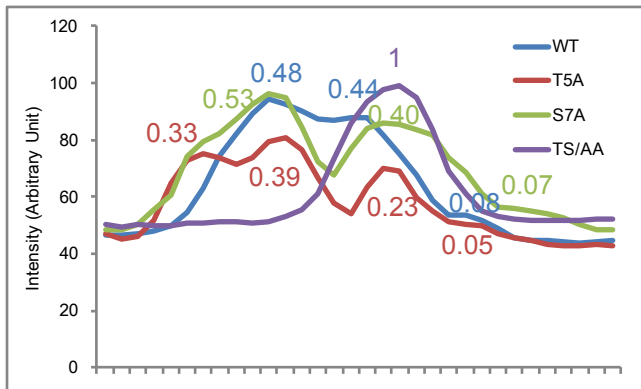

Fig. 4F

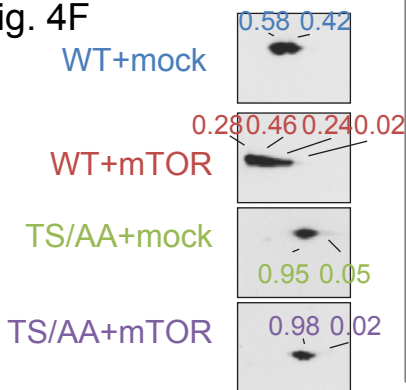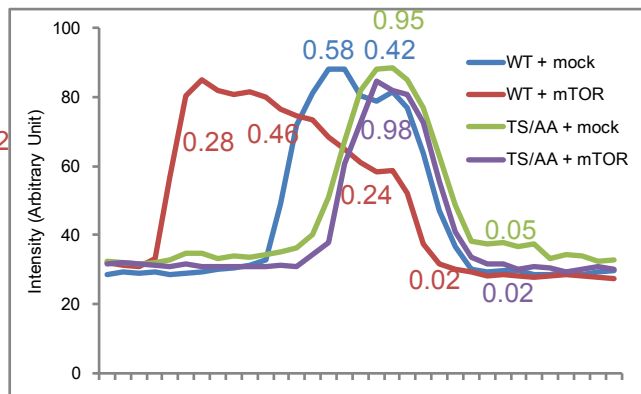

Fig. 4G

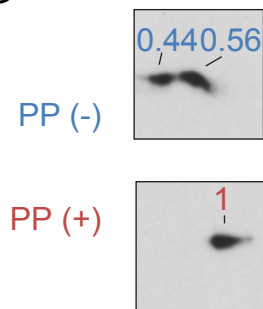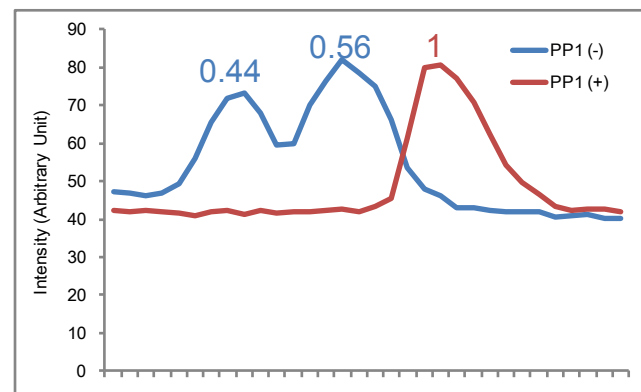

Figure S4

HEK293:

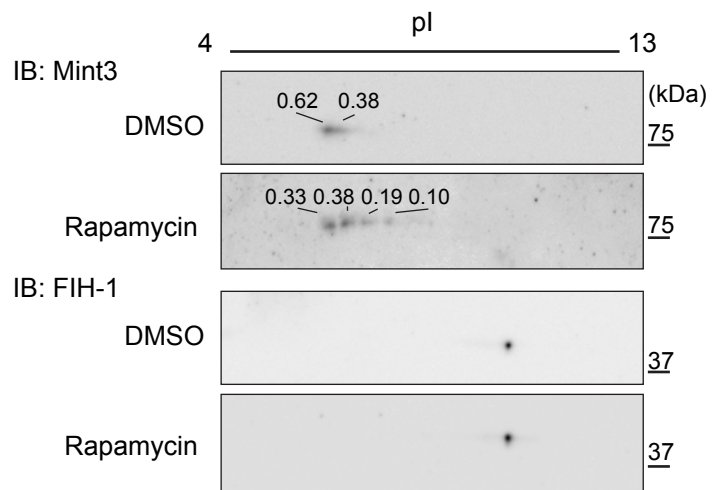

Figure S5

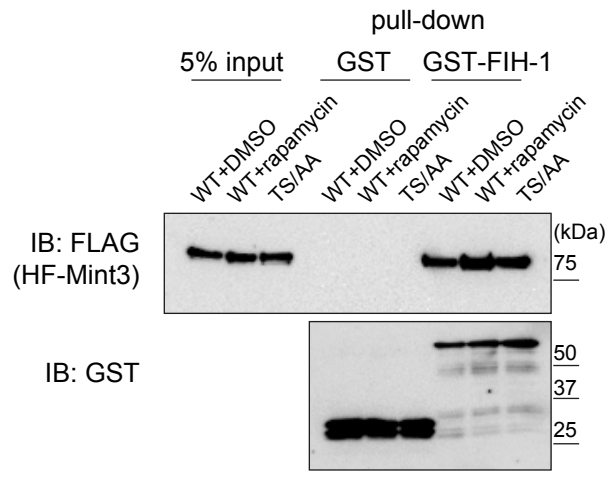

Figure S6

HIF-2 $\alpha$  activity

A

HEK293:

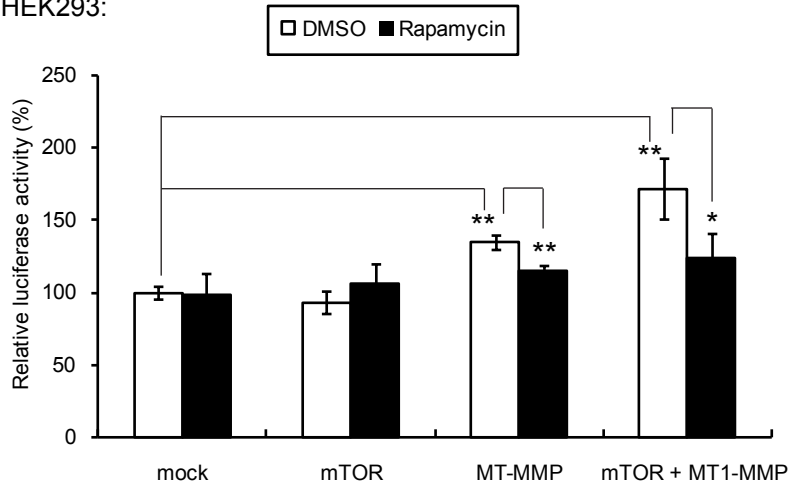

B

HT1080:

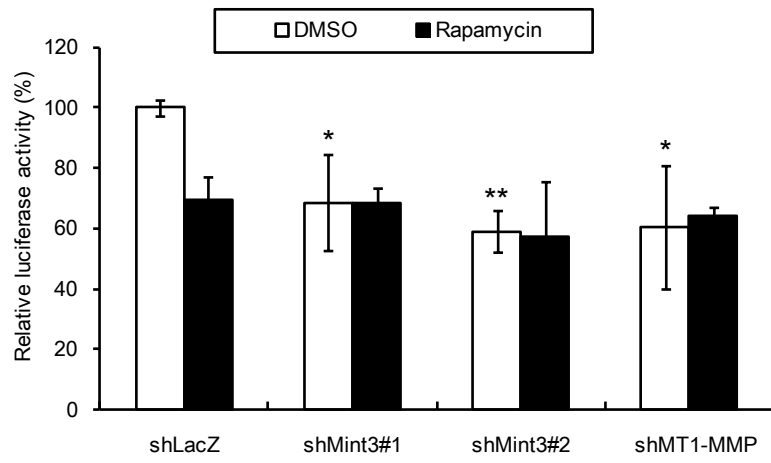



Table S1

|         |    |                                                    |
|---------|----|----------------------------------------------------|
| MT1-MMP |    | 5'-gcagccucucacuacucuuccgaagaagaguagugagaggcugc-3' |
| Mint3   | #1 | gaugauggcgggugacgggacgaauccgucaccaccgccauca        |
|         | #2 | gcgguuuugguccguaugacgaaucauacaggaccaagaaccgc       |
| mTOR    | #1 | gcaaagaucucaugggcuucgcgaacgaagcccaugagaucuuugc     |
|         | #2 | gcauccagcaggauaucaaggcgaaccuugauauccugcuggaugc     |
| Raptor  | #1 | ggaaaccaagagagaggaagacgaaucuuccucucuuugguuucc      |
|         | #2 | gcgaaugagacggacuugacgaaucaaguccgucucaauucgc        |
| Rictor  | #1 | gcuauaacugcugguauuagacgaaucauuaccagcaguuauagc      |
|         | #2 | gccuuuauccauuugugaagucgaaacuucacaaauggauaaaggc     |
| S6K1    | #1 | gcuugugauacucuugauacucgaaaguaucaagaguaucacaagc     |
|         | #2 | gcacacaccuauugcauuauaggcgaaccuauuugcauagguguguc    |
| 4E-BP1  | #1 | ggaaguggacaagaacgaaccgaagguucguucuuguccacuucc      |
|         | #2 | guucguucuuguccacuuccggaacaggaaguggacaagaacgaa      |
| Lipin1  | #1 | gcuaggaguugggugcauuugcgaacaaugcacccaacuccuagc      |
|         | #2 | gcucaaggcuggaauuuuaucgaauuuuuauuccagccuugagc       |
| CLIP1   | #1 | gcuaaagccaagugggcuuaacgaauuuagcccacuuggcuuuagc     |
|         | #2 | ggaguuagaugagccacuuggcgaaccaaguggcucaucuaacucc     |
| STAT3   | #1 | gcuacauacuccuggcauugccgaagcaaugccaggaguauaguagc    |
|         | #2 | gcacuuguaauggcgucuucacgaaugaagacgccauuacaagugc     |

Table S2

|         |               |                            |
|---------|---------------|----------------------------|
| β-actin | Sense (S)     | 5'-GGGACGACATGGAGAAAATC-3' |
|         | Antisense (A) | 5'-GGGTGTTGAAGGTCTCAAAC-3' |
| GLUT1   | S             | GGGCATGTGCTTCCAGTATGT      |
|         | A             | ACCAGGAGCACAGTGAAGAT       |
| HK2     | S             | GTCCACTCCAGATGGGACAG       |
|         | A             | GGAGCCATTGTCCGTTACT        |
| PGK1    | S             | GCATACCTGCTGGCTGGATG       |
|         | A             | CCCACAGGACCATTCCACAC       |
| LDHA    | S             | CTCCAAGCTGGTCATTATCACG     |
|         | A             | AGTTCGGGCTGTATTTACAACA     |
| PDK1    | S             | TCCTGTCACCAGCCAGAATG       |
|         | A             | CTTCCTTTGCCTTTTCCACC       |
